# Supplementary material for: Enhanced synthesis of multiblock copolymers via acid-triggered RAFT polymerization
Source: Royal Society of Chemistry journal article supplement (doi:10.1039/d4sc00399c), 2024-01-01
Supplement: d4sc00399c1.pdf [file d4sc00399c1.pdf]

## Supporting Information

### **Enhanced Synthesis of Multiblock Copolymers via Acid-Triggered RAFT Polymerization**

Maria-Nefeli Antonopoulou,<sup>a</sup> Nghia P. Truong,<sup>a</sup> Athina Anastasaki<sup>a\*</sup>

<sup>a</sup>*Laboratory of Polymeric Materials, Department of Materials, ETH Zürich, Vladimir-Prelog-Weg 5, 8093 Zürich, Switzerland.*

# Table of Contents

## Contents

|                                                                                                                    |           |
|--------------------------------------------------------------------------------------------------------------------|-----------|
| <b>Materials and Methods .....</b>                                                                                 | <b>3</b>  |
| <b>Materials.....</b>                                                                                              | <b>3</b>  |
| <b>Instrumentation .....</b>                                                                                       | <b>3</b>  |
| <b>RAFT Livingness equation .....</b>                                                                              | <b>3</b>  |
| <b>Synthesis of PDMA DP=500 for kinetic study with CTA 1 in absence of acid (2% VA-044).....</b>                   | <b>4</b>  |
| <b>Synthesis of PDMA DP=500 for kinetic study with CTA 1 in presence of acid (2% VA-044).....</b>                  | <b>4</b>  |
| <b>Synthesis of PDMA DP=500 for kinetic study with CTA 1 in the absence of acid (8% VA-044).....</b>               | <b>5</b>  |
| <b>Synthesis of PDMA DP=500 for kinetic study with CTA 2 in presence of acid.....</b>                              | <b>5</b>  |
| <b>Synthesis of pentablock copolymer (DP=100) via conventional RAFT .....</b>                                      | <b>5</b>  |
| <b>Synthesis of pentablock copolymer (DP=100) via acid-triggered RAFT .....</b>                                    | <b>6</b>  |
| <b>Synthesis of pentablock copolymer (DP=100) via acid-triggered RAFT (without any VA-044).....</b>                | <b>7</b>  |
| <b>Synthesis of pentablock copolymer (DP=200) via acid-triggered RAFT .....</b>                                    | <b>7</b>  |
| <b>Synthesis of pentablock copolymer (DP=500) via acid-triggered RAFT .....</b>                                    | <b>8</b>  |
| <b>Synthesis of icosablock copolymer (B1 DP=30, B2-B20 DP=6).....</b>                                              | <b>8</b>  |
| <b>Synthesis of pentablock copolymer with methacrylate, acrylate, and acrylamide via conventional RAFT.....</b>    | <b>9</b>  |
| <b>Synthesis of pentablock copolymer with methacrylate, acrylate, and acrylamide via acid-triggered RAFT .....</b> | <b>10</b> |
| <b>Data corresponding to Figure 2 .....</b>                                                                        | <b>11</b> |
| <b>Data corresponding to Figure 3 .....</b>                                                                        | <b>15</b> |
| <b>Data corresponding to Figure 4.....</b>                                                                         | <b>18</b> |
| <b>Data corresponding to Figure 5.....</b>                                                                         | <b>22</b> |
| <b>References .....</b>                                                                                            | <b>26</b> |

## Materials and Methods

### Materials

The trithiocarbamate 2-[[[(Butylsulfanyl)carbothioyl]sulfanyl] propanoic acid was synthesized via an existing protocol from N. T. Phuong in Monash University and was sent to ETH Zurich. All the other materials (methyl 2-[methyl(4-pyridinyl)carbamoithioylthio]propionate), VA-044) were purchased from Sigma Aldrich or Fischer Scientific and used as received. Acrylamide monomers (DMA and NAM) and were used without purification. Distilled water was used for all experiments. Acid solutions were prepared with H<sub>2</sub>SO<sub>4</sub> (18M).

### Instrumentation

<sup>1</sup>H NMR spectra were recorded on a DPX-300 spectrometer in D<sub>2</sub>O. Chemical shifts are given in ppm downfield from tetramethylsilane referenced to residual D<sub>2</sub>O protons. Monomer conversions were determined via <sup>1</sup>H NMR spectroscopy by comparing the integrals of monomeric vinyl protons to polymer signals. Theoretical molecular weights were calculated based on the target degree of polymerization and the amount of conversion achieved. SEC analysis of polymer samples was performed using a Shimadzu modular system comprising of a CBM-20A system controller, an SIL-20A automatic injector, a 10.0 µm bead-size guard column (50 × 7.5 mm) followed by three KF-805L columns (300 × 8 mm, bead size: 10 µm, pore size maximum: 5000 Å), an SPD-20A ultraviolet detector, and an RID-20A differential refractive-index detector. The temperature of the columns was maintained at 40 °C using a CTO-20A oven. The eluent was N,N-dimethylacetamide (HPLC grade, with 0.03% w/v LiBr) and the flow rate was kept at 1 mL min<sup>-1</sup> using an LC-20AD pump. A molecular weight calibration curve was produced using commercial narrow molecular weight distribution poly(methyl methacrylate) standards with molecular weights ranging from 5000 to 1.5 × 10<sup>6</sup>.

### RAFT Livingness equation

$$L = \frac{[CTA]_0}{[CTA]_0 + 2f[I]_{Bx} \left(1 - e^{-k_d t}\right) \left(1 - \frac{f_c}{2}\right)}$$

Equation used to calculate the livingness (*L*) of polymerization, where [CTA]<sub>0</sub> is the initial concentration of the chain transfer agent. *k<sub>d</sub>* is the decomposition rate constant of

the VA-044 ( $0.0043\text{ s}^{-1}$ ).  $t$  represents the polymerization time. The factor of 2 is because one molecule of initiator yields two primary radicals with an efficiency of  $f=0.5$ . This is a typical value from the literature.<sup>1</sup> The term  $1 - (f_c/2)$  represents the number of chains produced by coupling termination events with  $f_c$  the coupling factor.  $[I]_{Bx}$  is the amount of initiator present for each block synthesis, incorporating that added and what is remaining from the previous block. The method of calculation is the same as that used by Perrier and Coworkers.<sup>1</sup>

#### **Synthesis of PDMA DP=500 for kinetic study with CTA 1 in absence of acid (2% VA-044)**

In a 15 mL vial 6.75 mg of trithiocarbamate 2- $\{[(\text{Butylsulfanyl})\text{carbothioyl}]\text{sulfanyl}\}$  propanoic acid (CTA 1,  $28.5\text{ }\mu\text{mol}$ , 1 equiv.) was added. The CTA was dissolved in 1.468 mL of DMA (500 equiv.). An initiator stock solution containing 100 mg of VA-044 in 10 mL of deionized  $\text{H}_2\text{O}$  was prepared, and 18.4  $\mu\text{L}$  (0.184 mg,  $0.57\text{ }\mu\text{mol}$ , 0.02 equiv.) of this solution were transferred to the vial. Then 5.854 mL of water and a stirring bar were added to the vial and sealed with the septa. The solution was degassed for 15 mins, and then the polymerization was conducted at  $70\text{ }^\circ\text{C}$  and samples were taken periodically.

#### **Synthesis of PDMA DP=500 for kinetic study with CTA 1 in presence of acid (2% VA-044)**

In a 15 mL vial 6.75 mg of trithiocarbamate 2- $\{[(\text{Butylsulfanyl})\text{carbothioyl}]\text{sulfanyl}\}$  propanoic acid (CTA,  $28.5\text{ }\mu\text{mol}$ , 1 equiv.) was added. The CTA was dissolved in 1.468 mL of DMA (500 equiv.). An initiator stock solution containing 100 mg of VA-044 in 10 mL of deionized  $\text{H}_2\text{O}$  was prepared, and 18.4  $\mu\text{L}$  (0.184 mg,  $0.57\text{ }\mu\text{mol}$ , 0.02 equiv.) of this solution were transferred to the vial. Then 5.854 mL of water,

15.8 uL (10 equiv., 18 M) of sulfuric acid (SA) and a stirring bar were added to the vial and sealed with the septa. The solution was degassed for 15 mins, and then the polymerization was conducted at 70 °C and samples were taken periodically.

**Synthesis of PDMA DP=500 for kinetic study with CTA 1 in the absence of acid (8% VA-044)**

In a 15 mL vial 7.7 mg of trithiocarbamate 2-[[ (Butylsulfanyl)carbothioyl]sulfanyl]propanoic acid (CTA, 28.5  $\mu$ mol, 1 equiv.) was added. The CTA was dissolved in 1.468 mL of DMA (500 equiv.). An initiator stock solution containing 100 mg of VA-044 in 10 mL of deionized H<sub>2</sub>O was prepared, and 73.6 uL (0.736 mg, 2.16  $\mu$ mol, 0.08 equiv.) of this solution were transferred to the vial. The solution was degassed for 15 mins, and then the polymerization was conducted at 70 °C and samples were taken periodically.

**Synthesis of PDMA DP=500 for kinetic study with CTA 2 in presence of acid**

In a 15 mL vial 7.7 mg of methyl 2-[methyl(4 -pyridinyl)carbamoithioylthio]propionate (CTA, 28.5  $\mu$ mol, 1 equiv.) was added. The CTA was dissolved in 1.468 mL of DMA (500 equiv.). An initiator stock solution containing 100 mg of VA-044 in 10 mL of deionized H<sub>2</sub>O was prepared, and 18.4 uL (0.184 mg, 0.57  $\mu$ mol, 0.02 equiv.) of this solution were transferred to the vial. Then 5.854 mL of water, 15.8 uL (10 equiv., 18 M) of sulfuric acid (SA) and a stirring bar were added to the vial and sealed with the septa. The solution was degassed for 15', and then the polymerization was conducted at 70°C and samples were taken periodically.

**Synthesis of pentablock copolymer (DP=100) via conventional RAFT**

In a 15 mL vial 6.8 mg of 2-(((Butylsulfanyl)carbothioyl)sulfanyl)propanoic acid (CTA, 28.5  $\mu$ mol, 1 equiv.) was added. The CTA was dissolved in 0.293 mL of DMA

(100 equiv.). An initiator stock solution containing 100 mg of VA-044 in 10 mL of deionized H<sub>2</sub>O was prepared, and 24.9  $\mu$ L (0.027 equiv.) of this solution were transferred to the vial. Then 1.151 mL of water, and a stirring bar were added to the vial and sealed with the septa. The solution was degassed for 15 mins, and then the polymerization was conducted at 70 °C for 75 minutes to reach a high conversion (97%). In a separate vial, 0.358 mL of NAM (0.402 g, 2.85 mmol, 100 equiv., 20% solution v/v and 16.6  $\mu$ L of initiator solution (0.166 mg, 0.51  $\mu$ mol, 0.018 equiv.) were mixed and degassed together for 15 minutes prior to addition to the polymerization mixture via a nitrogen purged syringe. Polymerization was again conducted for 65 mins, yielding a diblock copolymer with high conversion (>99%). The same procedure was followed for the three additional blocks.

#### **Synthesis of pentablock copolymer (DP=100) via acid-triggered RAFT**

In a 15 mL vial 7.7 mg of methyl 2-[methyl(4-pyridinyl)carbamothioylthio]propionate (CTA, 28.5  $\mu$ mol, 1 equiv.) was added. The CTA was dissolved in 0.293 mL of DMA (100 equiv.). An initiator stock solution containing 100 mg of VA-044 in 10 mL of deionized H<sub>2</sub>O was prepared, and 12.3  $\mu$ L (0.0133 equiv.) of this solution were transferred to the vial. Then 1.159 mL of water, 4.75  $\mu$ L (3 equiv., 18 M) of sulfuric acid (SA) and a stirring bar were added to the vial and sealed with the septa. The solution was degassed for 15 mins, and then the polymerization was conducted at 70 °C for 120 minutes to reach a high conversion (97%). In a separate vial, 0.358 mL of NAM (0.402 g, 2.85 mmol, 100 equiv., 20% solution v/v, 3.17  $\mu$ L (18 M) 6.2  $\mu$ L of initiator solution (0.062 mg, 0.19  $\mu$ mol, 0.0067 equiv.) were mixed and degassed together for 15 minutes prior to addition to the polymerization mixture via a nitrogen purged syringe. Polymerization was again conducted for 65 mins, yielding a diblock

copolymer with high conversion (>99%). The same procedure was followed for the three additional blocks.

#### **Synthesis of pentablock copolymer (DP=100) via acid-triggered RAFT (without any VA-044)**

In a 5 mL vial 7.7 mg of methyl 2-[methyl(4-pyridinyl)carbamothioylthio]propionate (CTA, 28.5  $\mu$ mol, 1 equiv.) was added. The CTA was dissolved in 0.293 mL of DMA (100 equiv.). Then 0.293 mL of water, 1.2  $\mu$ L (18 M) of sulfuric acid (SA) and a stirring bar were added to the vial and sealed with the septa. The solution was degassed for 15 mins, and then the polymerization was conducted at 70 °C for 20 hours to reach a high conversion (94%). In a separate vial, 0.358 mL of NAM (0.402 g, 2.85 mmol, 100 equiv., 42% solution v/v and 0.5  $\mu$ L (18 M) were mixed and degassed together for 15 minutes prior to addition to the polymerization mixture via a nitrogen purged syringe. Polymerization was again conducted for 20 hours, yielding a diblock copolymer with high conversion (>99%). The same procedure was followed for the three additional blocks.

#### **Synthesis of pentablock copolymer (DP=200) via acid-triggered RAFT**

In a 15 mL vial 7.7 mg of methyl 2-[methyl(4-pyridinyl)carbamothioylthio]propionate (CTA, 28.5  $\mu$ mol, 1 equiv.) was added. The CTA was dissolved in 0.587 mL of DMA (200 equiv.). An initiator stock solution containing 100 mg of VA-044 in 10 mL of deionized H<sub>2</sub>O was prepared, and 8.29  $\mu$ L (0.0070 equiv.) of this solution were transferred to the vial. Then 2.34 mL of water, 4.75  $\mu$ L (3 equiv., 18 M) of sulfuric acid (SA) and a stirring bar were added to the vial and sealed with the septa. The solution was degassed for 15 min, and then the polymerization was conducted at 70°C for 75 minutes to reach a high conversion (97%). In a separate vial, 0.717 mL of NAM (0.804

g, 5.7 mmol, 200 equiv., 20% solution v/v and 3.04  $\mu\text{L}$  of initiator solution (0.09  $\mu\text{mol}$ , 0.0033 equiv.) were mixed and degassed together for 15 minutes prior to addition to the polymerization mixture via a nitrogen purged syringe. Polymerization was again conducted for 65 min, yielding a diblock copolymer with high conversion (>99%). The same procedure was followed for the triblock, tetrablock, and pentablock respectively.

### **Synthesis of pentablock copolymer (DP=500) via acid-triggered RAFT**

In a 15 mL vial 3.2mg of methyl 2-[methyl(4-pyridinyl)carbamothioylthio]propionate (CTA, 36.2  $\mu\text{mol}$ , 1 equiv.) was added. The CTA was dissolved in 0.610 mL of DMA (500 equiv.). An initiator stock solution containing 100 mg of VA-044 in 10 mL of deionized  $\text{H}_2\text{O}$  was prepared, and 7.73  $\mu\text{L}$  (0.0202 equiv.) of this solution were transferred to the vial. Then 2.431 mL of water, 6.57  $\mu\text{L}$  (10 equiv., 18 M) of sulfuric acid (SA) and a stirring bar were added to the vial and sealed with the septa. The solution was degassed for 15', and then the polymerization was conducted at 70°C for 90 minutes to reach a high conversion (97%). In a separate vial, 0.745 ml of NAM (0.836 g, 5.9 mmol, 500 equiv., 20% solution v/v and 4.59  $\mu\text{L}$  of initiator solution (0.046 mg, 0.14  $\mu\text{mol}$ , 0.0120 equiv.) were mixed and degassed together for 15 minutes prior to addition to the polymerization mixture via a nitrogen purged syringe. Polymerization was again conducted for 90', yielding a diblock copolymer. This process was repeated for all subsequent blocks.

### **Synthesis of icosablock copolymer (B1 DP=30, B2-B20 DP=6)**

In a 5 mL vial 31.2 mg of methyl 2-[methyl(4-pyridinyl)carbamothioylthio]propionate (CTA, 36.2  $\mu\text{mol}$ , 1 equiv.) was added. The CTA was dissolved in 0.436 mL of NAM (30 equiv.). An initiator stock solution containing 100 mg of VA-044 in 10 mL of deionized  $\text{H}_2\text{O}$  was prepared, and 11.19  $\mu\text{L}$  (0.0030 equiv.) of this solution were

transferred to the vial. Then 2.457 mL of water, 6.40  $\mu$ L (1 equiv., 18 M) of sulfuric acid (SA) and a stirring bar were added to the vial and sealed with the septa. The solution was degassed for 15 mins under argon, and then the polymerization was conducted at 70 °C for 50 minutes to reach a high conversion (99%). In a separate vial, 0.0714 ml of DMA (68.7 mg, 0.69 mmol, 6 equiv., 20% solution v/v and 6.34  $\mu$ L of initiator solution (0.063 mg, 0.20  $\mu$ mol, 0.0017 equiv.) were mixed and degassed together for 15 minutes prior to addition to the polymerization mixture via a nitrogen purged syringe. Polymerization was again conducted for 50 mins, yielding a diblock copolymer. This process was repeated for all subsequent blocks. After block 7, the reaction was stopped, and half of the quantity was removed from the vial. The solution remaining in the vial was again degassed for 15'. On parallel in a separate vial the aliquot containing block 8 was also degassed, and with a degassed needle the aliquot is transferred to the reaction vial. The polymerization is conducted at 70°C to reach a high conversion (97%). The same procedure was followed for all the subsequent blocks until an icosablock was synthesized.

#### **Synthesis of pentablock copolymer with methacrylate, acrylate, and acrylamide via conventional RAFT**

In a 5 mL vial 7.5 mg of 4-((((2-Carboxyethyl)thio)carbonothioyl)thio)-4-cyanopentanoic acid (CTA, 24.4  $\mu$ mol, 1 equiv.) and 0.52 mL of glycerol monomethacrylate (11.2 % v/v, 15 equiv.) was added. An initiator stock solution containing 100 mg of VA-044 in 10 mL of deionized H<sub>2</sub>O was prepared, and 17.4  $\mu$ L (0.022 equiv.) of this solution was transferred to the vial. Then a stirring bar was added to the vial and sealed with the septa. The solution was degassed for 15 mins, and then the polymerization was conducted at 70 °C for 120 minutes to reach a high conversion (98%). In a separate vial, 0.16 ml of PEGA<sub>480</sub> (0.17 g, 0.37 mmol, 15 equiv., 20%

solution v/v and 23.7  $\mu\text{L}$  of initiator solution (0.73  $\mu\text{mol}$ , 0.030 equiv.) were mixed and degassed together for 15 minutes prior to addition to the polymerization mixture via a nitrogen purged syringe. Polymerization was again conducted for 120 mins, yielding a diblock copolymer with high conversion (>99%). The same procedure was followed for the three additional blocks.

### **Synthesis of pentablock copolymer with methacrylate, acrylate, and acrylamide via acid-triggered RAFT**

In a 5 mL vial 7.5 mg of 4-((((2-Carboxyethyl)thio)carbonothioyl)thio)-4-cyanopentanoic acid (CTA, 24.4  $\mu\text{mol}$ , 1 equiv.) and 0.52 mL of glycerol monomethacrylate (11.2 % v/v, 15 equiv.) was added. An initiator stock solution containing 100 mg of VA-044 in 10 mL of deionized  $\text{H}_2\text{O}$  was prepared, and 11.8  $\mu\text{L}$  (0.37 mmol, 0.015 equiv.) of this solution and 0.7  $\mu\text{L}$  of  $\text{H}_2\text{SO}_4$  (18 M) was transferred to the vial. Then a stirring bar was added to the vial and sealed with the septa. The solution was degassed for 15 mins, and then the polymerization was conducted at 70  $^\circ\text{C}$  for 120 minutes to reach a high conversion (>99%). In a separate vial, 0.16 mL of PEGA<sub>480</sub> (0.17 g, 0.37 mmol, 15 equiv., 20% solution v/v, 14.2  $\mu\text{L}$  of initiator solution (0.44  $\mu\text{mol}$ , 0.018 equiv.) and 1.5  $\mu\text{L}$  of  $\text{H}_2\text{SO}_4$  (18 M) were mixed and degassed together for 15 minutes prior to addition to the polymerization mixture via a nitrogen purged syringe. Polymerization was again conducted for 120 mins, yielding a diblock copolymer with high conversion (97%). The same procedure was followed for the three additional blocks.

# Data corresponding to Figure 2

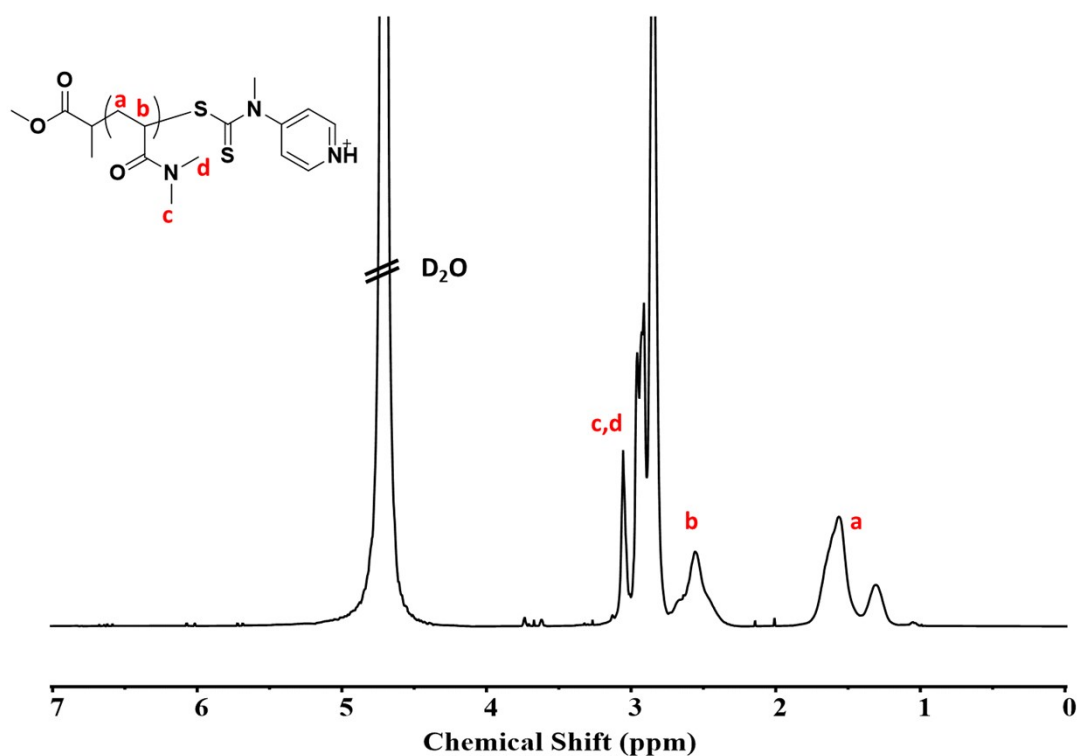

**Figure S1.** A representative <sup>1</sup>H NMR spectra of PDMA homopolymer synthesized by RAFT polymerization

**Table S1.** Experimental conditions and characterization data for the kinetic study of PDMA for DP=500. Data corresponds to Figure 2.

| Entry | CTA   | CTA (mg) | CTA (10 <sup>-5</sup> mol) | DP  | M   | Monomer (10 <sup>-3</sup> mol) | Monomer (mL) | [VA-044]:[CTA] | VA-044 (10 <sup>-7</sup> mol) | Initiator (ul) | M%  | H <sub>2</sub> SO <sub>4</sub> (uL) | H <sub>2</sub> O (mL) | Vtot (mL) |
|-------|-------|----------|----------------------------|-----|-----|--------------------------------|--------------|----------------|-------------------------------|----------------|-----|-------------------------------------|-----------------------|-----------|
| 1     | CTA 1 | 6.8      | 2.85                       | 500 | DMA | 14.2                           | 1.468        | 0.02           | 5.7                           | 18.4           | 0.2 | -                                   | 5.85                  | 7.34      |

|   |       |     |      |     |     |      |       |      |      |      |     |      |      |      |
|---|-------|-----|------|-----|-----|------|-------|------|------|------|-----|------|------|------|
| 2 | CTA 1 | 6.8 | 2.85 | 500 | DMA | 14.2 | 1.468 | 0.02 | 5.7  | 18.4 | 0.2 | 15.8 | 5.85 | 7.34 |
| 3 | CTA 1 | 6.8 | 2.85 | 500 | DMA | 14.2 | 1.468 | 0.08 | 22.8 | 73.6 | 0.2 | -    | 5.85 | 7.34 |
| 4 | CTA 2 | 7.7 | 2.85 | 500 | DMA | 14.2 | 1.468 | 0.02 | 5.7  | 18.4 | 0.2 | 15.8 | 5.85 | 7.34 |

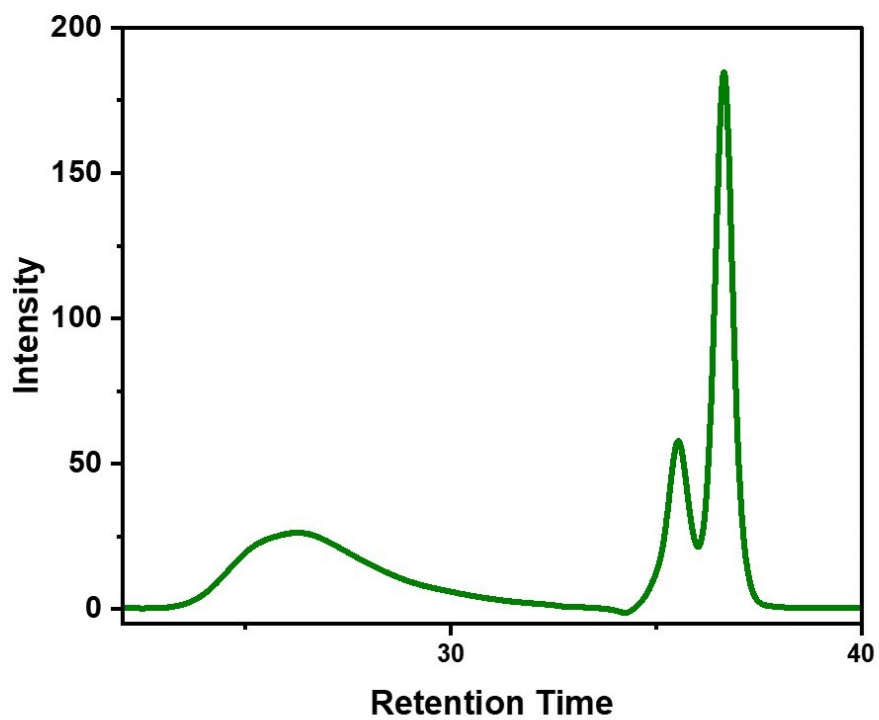

**Figure S2.** UV-trace of PDMA kinetic with CTA 1 and 2% VA-044 at final conversion (30%). The peak at 35.5 min represents the unreacted monomer and the peak at 36.6 the unreacted CTA.

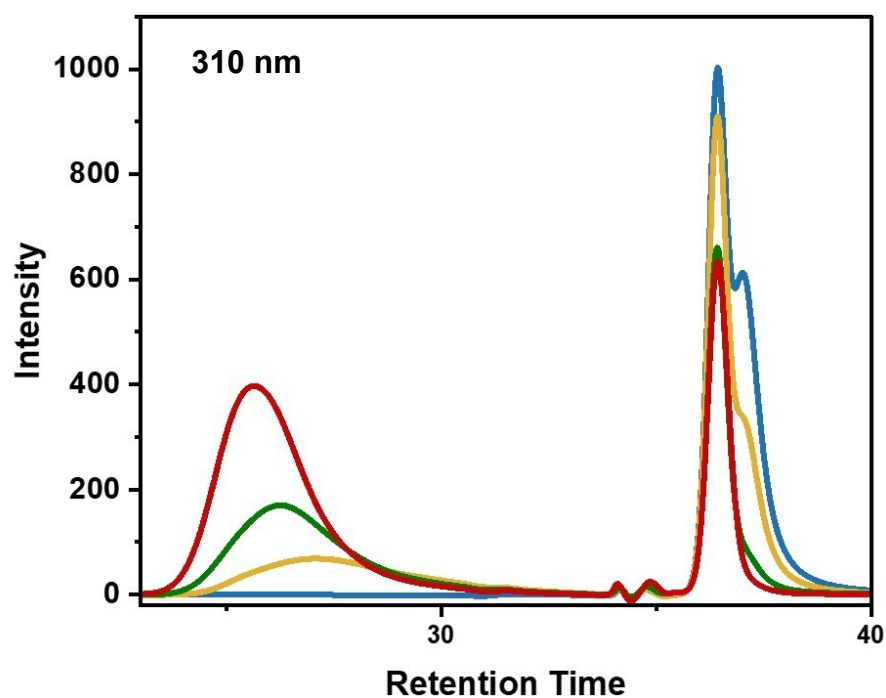

**Figure S3.** UV-trace of PDMA kinetic with CTA 1, 8% VA-044 and no acid. The blue trace represents  $t_0$ . The dark yellow trace at 16% there is unreacted CTA. At 42% conversion (green trace) there is still unreacted CTA. At 64% conversion (red trace) the CTA has been fully consumed. Full CTA consumption is achieved between 42% and 64% conversion.

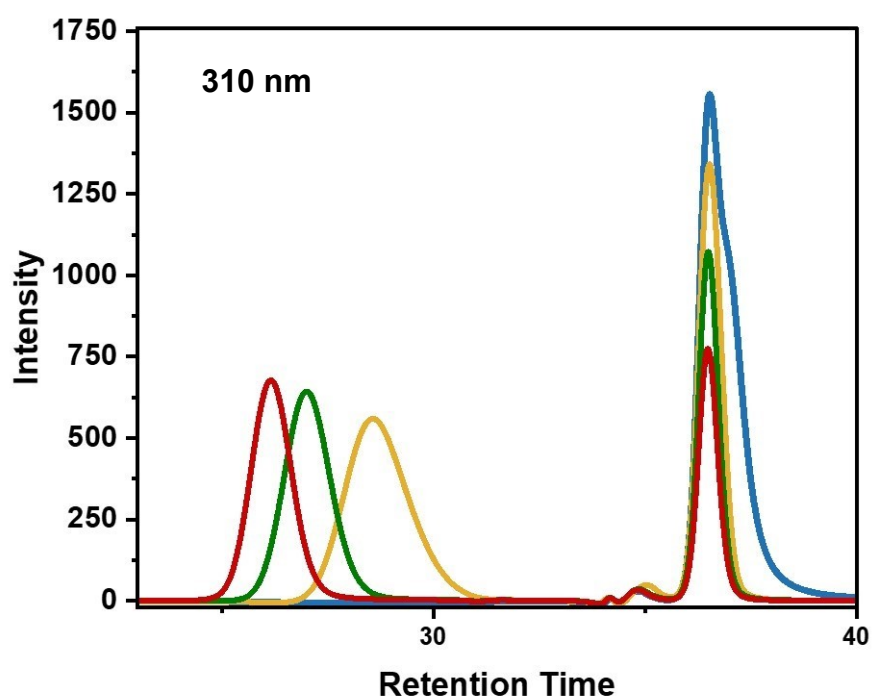

**Figure S4.** UV-trace of PDMA kinetic with CTA 1, 2% VA-044 and 10 eq. of acid. The blue trace represents  $t_0$ . The dark yellow trace at 14% conversion shows the full consumption of the CTA.

Data corresponding to Figure 3

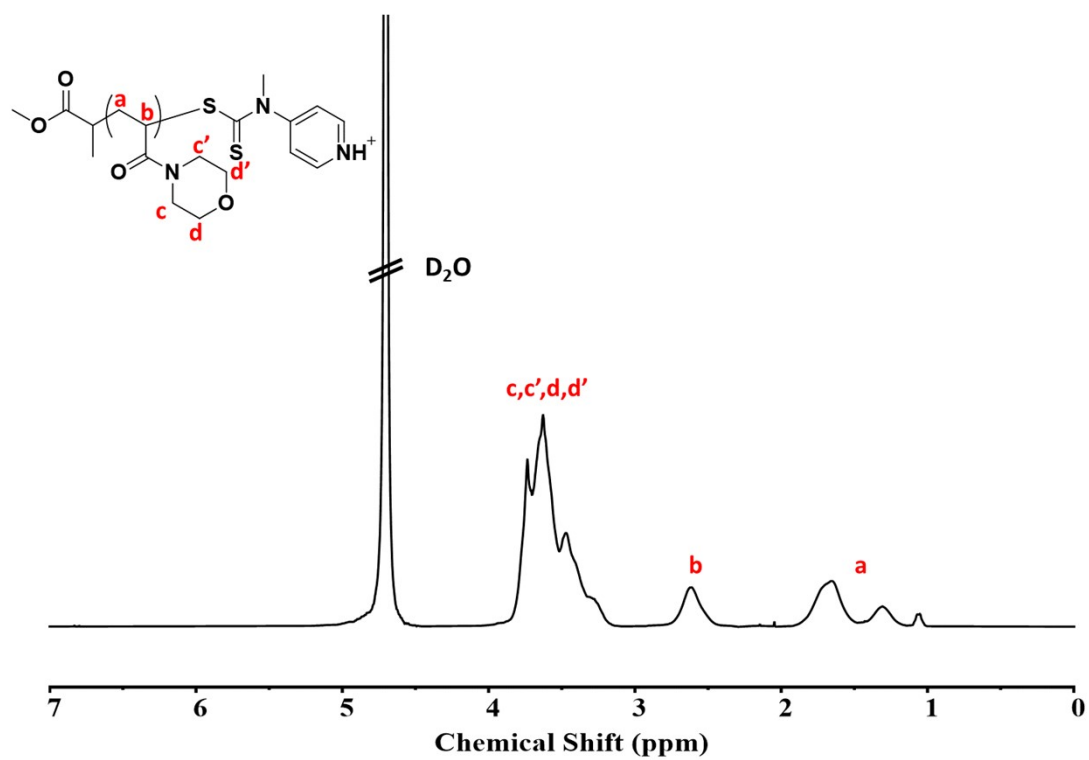

**Figure S5.** A representative  $^1\text{H}$  NMR spectra of PNAM homopolymer synthesized by RAFT polymerization.

**Table S2.** Experimental conditions and characterization data for the synthesis of P(DMA-b-NAM-b-DMA-b- NAM-b -DMA-b-NAM-b-DMA-b-NAM-b-DMA-b- NAM) pentablock copolymer with DP=100.<sup>[a]</sup> Data corresponds to Figure 3a-3c.

| No. block | CTA 1 (mg) | CTA (10 <sup>-5</sup> mol) | DP  | M   | Monomer (10 <sup>-3</sup> mol) | Monomer (mL) | [VA-044]:[CTA] <sup>[b]</sup> | VA-044 (10 <sup>-7</sup> mol) | I <sub>added</sub> (ul) <sup>[c]</sup> | M%  | H <sub>2</sub> SO <sub>4</sub> (uL) | H <sub>2</sub> O (mL) | V <sub>tot</sub> (mL) | I <sub>rem</sub> (10 <sup>-8</sup> mol) | I <sub>tot</sub> (10 <sup>-7</sup> mol) <sup>[d]</sup> | % Conv. <sup>[e]</sup> | $\bar{D}$ | $M_n$ (Theor.) (g mol <sup>-1</sup> ) <sup>[f]</sup> | $M_n$ (SEC) | %L Block | %L Total |
|-----------|------------|----------------------------|-----|-----|--------------------------------|--------------|-------------------------------|-------------------------------|----------------------------------------|-----|-------------------------------------|-----------------------|-----------------------|-----------------------------------------|--------------------------------------------------------|------------------------|-----------|------------------------------------------------------|-------------|----------|----------|
| 1         | 6.8        | 2.85                       | 100 | DMA | 2.85                           | 0.293        | 0.027                         | 7.7                           | 24.9                                   | 0.2 | -                                   | 1.151                 | 1.467                 |                                         | 7.7                                                    | 94                     | 1.09      | 9600                                                 | 12300       | 97.5     | 97.5     |
| 2         | -          | -                          | 100 | NAM | 2.85                           | 0.358        | 0.018                         | 5.1                           | 16.6                                   | 0.2 | -                                   | 1.419                 | 1.792                 | 3.5                                     | 5.5                                                    | 97                     | 1.13      | 23200                                                | 27100       | 98.2     | 95.7     |
| 3         | -          | -                          | 100 | DMA | 2.85                           | 0.293        | 0.022                         | 6.3                           | 20.3                                   | 0.2 | -                                   | 1.155                 | 1.467                 | 2.5                                     | 6.5                                                    | 96                     | 1.20      | 32800                                                | 38900       | 97.8     | 93.6     |
| 4         | -          | -                          | 100 | NAM | 2.85                           | 0.358        | 0.020                         | 5.7                           | 18.4                                   | 0.2 | -                                   | 1.417                 | 1.792                 | 3.0                                     | 6.0                                                    | 97                     | 1.28      | 46500                                                | 22900       | 98.0     | 91.7     |
| 5         | -          | -                          | 100 | DMA | 2.85                           | 0.293        | 0.023                         | 6.6                           | 21.2                                   | 0.2 | -                                   | 1.154                 | 1.467                 | 2.7                                     | 2.7                                                    | 93                     | 1.38      | 55700                                                | 62300       | 97.7     | 89.6     |

[a] All polymerizations were performed in Water at 70 °C with 120 reaction time per block. The volume ratio of solvent to monomer was maintained at 0.80:0.20. [b] [CTA] refers to the initial equivalents of 2-(((Butylsulfanyl)carbothioyl)sulfanyl)propanoic acid and subsequently the equivalents of macroCTA derived from this CTA. No additional CTA was added during the subsequent block additions. [c] Initiator solution of 100 mg VA-044 in 10 mL H<sub>2</sub>O (0.0309 M). [d] Represents the total amount of VA-044 at time t<sub>0</sub> considering the moles of VA-044 added (I<sub>added</sub>) + the moles of VA-044 remaining (I<sub>rem</sub>) from the previous block after 2h. I<sub>rem</sub> = I<sub>total</sub> - 2fe<sup>-kd<sub>th</sub>t</sup> (1-fc/2)<sup>[1]</sup>. [e] Conversion was calculated by <sup>1</sup>H NMR. [f]  $M_{n(\text{theory})} = ([\text{Monomer}]_0/[\text{CTA}]_0) \cdot p \cdot M_{\text{monomer}} + M_{\text{CTA}}$ , where [Monomer]<sub>0</sub>/[CTA]<sub>0</sub> is the ratio of monomer to CTA at time zero, p is the conversion of polymerization and M<sub>monomer</sub> and M<sub>CTA</sub> are the molecular weights of the monomer and the CTA.

**Table S3.** Experimental conditions and characterization data for the synthesis of P(DMA-b-NAM-b-DMA-b- NAM-b -DMA-b-NAM-b-DMA-b-NAM-b-DMA-b- NAM) pentablock copolymer with DP=100.<sup>[a]</sup> Data corresponds to Figure3d-3c.

| No. block | CTA 2 (mg) | CTA (10 <sup>-5</sup> mol) | DP  | M   | Monomer (10 <sup>-3</sup> mol) | Monomer (mL) | [VA-044]:[CTA] <sup>[b]</sup> | VA-044 (10 <sup>-7</sup> mol) | I <sub>added</sub> (ul) <sup>[c]</sup> | M%  | H <sub>2</sub> SO <sub>4</sub> (uL) | H <sub>2</sub> O (mL) | V <sub>tot</sub> (mL) | I <sub>rem</sub> (10 <sup>-8</sup> mol) | I <sub>tot</sub> (10 <sup>-7</sup> mol) <sup>[d]</sup> | % Conv. <sup>[e]</sup> | $\bar{D}$ | $M_n$ (Theor.) (g mol <sup>-1</sup> ) <sup>[f]</sup> | $M_n$ (SEC) | %L Block | %L Total |
|-----------|------------|----------------------------|-----|-----|--------------------------------|--------------|-------------------------------|-------------------------------|----------------------------------------|-----|-------------------------------------|-----------------------|-----------------------|-----------------------------------------|--------------------------------------------------------|------------------------|-----------|------------------------------------------------------|-------------|----------|----------|
| 1         | 7.7        | 2.85                       | 100 | DMA | 2.85                           | 0.293        | 0.0133                        | 3.8                           | 12.3                                   | 0.2 | 4.75                                | 1.159                 | 1.467                 |                                         | 3.8                                                    | 97                     | 1.16      | 9900                                                 | 10400       | 99.0     | 99.0     |
| 2         | -          | -                          | 100 | NAM | 2.85                           | 0.358        | 0.0067                        | 1.9                           | 6.2                                    | 0.2 | 3.17                                | 1.427                 | 1.792                 | 6.2                                     | 2.5                                                    | 99                     | 1.16      | 23900                                                | 24200       | 99.3     | 98.3     |
| 3         | -          | -                          | 100 | DMA | 2.85                           | 0.293        | 0.0100                        | 4.3                           | 13.8                                   | 0.2 | 3.17                                | 1.160                 | 1.467                 | 4.2                                     | 4.7                                                    | 97                     | 1.14      | 33500                                                | 36600       | 98.7     | 97.0     |
| 4         | -          | -                          | 100 | NAM | 2.85                           | 0.358        | 0.0093                        | 2.6                           | 8.5                                    | 0.2 | 3.17                                | 1.425                 | 1.792                 | 7.7                                     | 3.4                                                    | 98                     | 1.16      | 47300                                                | 48200       | 99.0     | 96.1     |
| 5         | -          | -                          | 100 | DMA | 2.85                           | 0.293        | 0.0120                        | 3.5                           | 11.0                                   | 0.2 | 3.17                                | 1.163                 | 1.467                 | 5.6                                     | 4.0                                                    | 98                     | 1.17      | 57000                                                | 60300       | 98.9     | 95.0     |

[a] All polymerizations were performed in Water at 70 °C with 120 reaction time per block. The volume ratio of solvent to monomer was maintained at 0.80:0.20. [b] [CTA] refers to the initial equivalents of methyl 2-((methyl(4-pyridinyl)carbamothioylthio)propionate and subsequently the equivalents of macroCTA derived from this CTA. No additional CTA was added during the subsequent block additions. [c] Initiator solution of 100 mg VA-044 in 10 mL H<sub>2</sub>O (0.0309 M). [d] Represents the total amount of VA-044 at time t<sub>0</sub> considering the moles of VA-044 added (I<sub>added</sub>) + the moles of VA-044 remaining (I<sub>rem</sub>) from the previous block after 2h. I<sub>rem</sub> = I<sub>total</sub> - 2fe<sup>-kd<sub>th</sub>t</sup> (1-fc/2)<sup>[1]</sup>. [e] Conversion was calculated by <sup>1</sup>H NMR. [f]  $M_{n(\text{theory})} = ([\text{Monomer}]_0/[\text{CTA}]_0) \cdot p \cdot M_{\text{monomer}} + M_{\text{CTA}}$ , where [Monomer]<sub>0</sub>/[CTA]<sub>0</sub> is the ratio of monomer to CTA at time zero, p is the conversion of polymerization and M<sub>monomer</sub> and M<sub>CTA</sub> are the molecular weights of the monomer and the CTA.

**Table S4.** Experimental conditions and characterization data for the synthesis of P(DMA-b-NAM-b-DMA-b- NAM-b -DMA-b-NAM-b-DMA-b-NAM-b-DMA-b- NAM) pentablock copolymer with DP=100.<sup>[a]</sup> Data corresponds to Figure3d-3c.

| No. block | CTA 2 (mg) | CTA (10 <sup>-5</sup> mol) | DP  | M   | Monomer (10 <sup>-3</sup> mol) | Monomer (mL) | [VA-044]:[CTA] <sup>[b]</sup> | VA-044 (10 <sup>-7</sup> mol) | I <sub>added</sub> (uL) <sup>[c]</sup> | M%   | H <sub>2</sub> SO <sub>4</sub> (uL) | H <sub>2</sub> O (mL) | V <sub>tot</sub> (mL) | % Conv. <sup>[e]</sup> | $\bar{D}$ | $M_n^{(Theo.)}$ (g mol <sup>-1</sup> ) <sup>[f]</sup> | $M_n^{(SEC)}$ | Time (h) |
|-----------|------------|----------------------------|-----|-----|--------------------------------|--------------|-------------------------------|-------------------------------|----------------------------------------|------|-------------------------------------|-----------------------|-----------------------|------------------------|-----------|-------------------------------------------------------|---------------|----------|
| 1         | 7.7        | 2.85                       | 100 | DMA | 2.85                           | 0.293        | -                             | -                             | -                                      | 0.50 | 1.2                                 | 0.29                  | 0.58                  | 94                     | 1.25      | 9600                                                  | 8600          | 20       |
| 2         | -          | -                          | 100 | NAM | 2.85                           | 0.358        | -                             | -                             | -                                      | 0.42 | 0.5                                 | 0.50                  | 0.86                  | >99.9                  | 1.23      | 23700                                                 | 22600         | 20       |
| 3         | -          | -                          | 100 | DMA | 2.85                           | 0.293        | -                             | -                             | -                                      | 0.33 | 0.3                                 | 0.60                  | 0.89                  | >99.9                  | 1.19      | 33600                                                 | 39600         | 22       |
| 4         | -          | -                          | 100 | NAM | 2.85                           | 0.358        | -                             | -                             | -                                      | 0.32 | 0.2                                 | 0.75                  | 1.11                  | >99.9                  | 1.17      | 47700                                                 | 60400         | 20       |
| 5         | -          | -                          | 100 | DMA | 2.85                           | 0.293        | -                             | -                             | -                                      | 0.31 | 0.7                                 | 0.65                  | 0.94                  | 97                     | 1.23      | 57300                                                 | 75300         | 24       |

[a] All polymerizations were performed in Water at 70 °C with 120 reaction time per block. The volume ratio of solvent to monomer was maintained at 0.80:0.20. [b] [CTA] refers to the initial equivalents of of methyl 2-[methyl(4-pyridinyl)carbamothioylthio]propionate and subsequently the equivalents of macroCTA derived from this CTA. No additional CTA was added during the subsequent block additions. [c] Initiator solution of 100 mg VA-044 in 10 mL H<sub>2</sub>O (0.0309 M). [d] Represents the total amount of VA-044 at time t0 considering the moles of VA-044 added (I<sub>added</sub>) + the moles of VA-044 remaining (I<sub>rem</sub>) from the previous block after 2h. I<sub>rem</sub>=I<sub>total</sub> - 2fe-kd<sub>0</sub> (1-fc/2)<sup>[1]</sup>. [e] Conversion was calculated by <sup>1</sup>H NMR. [f]  $M_{n(theory)} = ([Monomer]_0/[CTA]_0) \cdot p \cdot M_{monomer} + M_{CTA}$ , where [Monomer]<sub>0</sub>/[CTA]<sub>0</sub> is the ratio of monomer to CTA at time zero, p is the conversion of polymerization and Mmonomer and MCTA are the molecular weights of the monomer and the CTA.

## Data corresponding to Figure 4

**Table S5.** Experimental conditions and characterization data for the synthesis of P(DMA-b-NAM-b-DMA-b- NAM-b -DMA) pentablock copolymer with DP=200.<sup>[a]</sup> Data corresponds to Figure 2a-2c.

| No. block | CTA 2 (mg) | CTA (10 <sup>-5</sup> mol) | DP  | M   | Monomer (10 <sup>-3</sup> mol) | Monomer (mL) | [VA-044]:[CTA] <sub>[b]</sub> | VA-044 (10 <sup>-7</sup> mol) | I <sub>added</sub> (uL) <sup>[c]</sup> | M%  | H <sub>2</sub> SO <sub>4</sub> (uL) | H <sub>2</sub> O (mL) | V <sub>tot</sub> (mL) | I <sub>rem</sub> (10 <sup>-8</sup> mol) | I <sub>tot</sub> (10 <sup>-7</sup> mol) <sup>[d]</sup> | % Conv. <sub>[e]</sub> | $\bar{D}$ | $M_n^{(Theo.)}$ (g mol <sup>-1</sup> ) <sub>[f]</sub> | $M_n^{(SEC)}$ | %L Block | %L Total |
|-----------|------------|----------------------------|-----|-----|--------------------------------|--------------|-------------------------------|-------------------------------|----------------------------------------|-----|-------------------------------------|-----------------------|-----------------------|-----------------------------------------|--------------------------------------------------------|------------------------|-----------|-------------------------------------------------------|---------------|----------|----------|
| 1         | 7.7        | 2.8                        | 200 | DMA | 5.7                            | 0.58694      | 0.0070                        | 1.96                          | 8.29                                   | 0.2 | 4.75                                | 2.34                  | 2.93                  |                                         | 2.6                                                    | 97                     | 1.15      | 19500                                                 | 20900         | 99.4     | 99.4     |
| 2         | -          | -                          | 200 | NAM | 5.7                            | 0.71666      | 0.0033                        | 0.94                          | 3.04                                   | 0.2 | 3.17                                | 2.86                  | 3.58                  | 3.7                                     | 1.3                                                    | 99                     | 1.18      | 47500                                                 | 45500         | 99.6     | 99.0     |
| 3         | -          | -                          | 200 | DMA | 5.7                            | 0.58694      | 0.0054                        | 1.50                          | 4.97                                   | 0.2 | 3.17                                | 2.33                  | 2.93                  | 1.9                                     | 1.7                                                    | 98                     | 1.17      | 66900                                                 | 68300         | 99.5     | 98.6     |
| 4         | -          | -                          | 200 | NAM | 5.7                            | 0.71666      | 0.0158                        | 4.50                          | 14.55                                  | 0.2 | 3.17                                | 2.84                  | 3.58                  | 2.5                                     | 4.7                                                    | >99.9                  | 1.19      | 95100                                                 | 93100         | 98.6     | 97.2     |
| 5         | -          | -                          | 200 | DMA | 5.7                            | 0.58694      | 0.0248                        | 7.10                          | 22.83                                  | 0.2 | 3.17                                | 2.32                  | 3.58                  | 6.9                                     | 7.7                                                    | 98                     | 1.22      | 114500                                                | 116600        | 97.8     | 95.0     |

[a] All polymerizations were performed in Water at 70 °C with 120 reaction time per block. The volume ratio of solvent to monomer was maintained at 0.80:0.20. [b] [CTA] refers to the initial equivalents of methyl 2-[methyl(4-pyridinyl)carbamothioylthio]propionate and subsequently the equivalents of macroCTA derived from this CTA. No additional CTA was added during the subsequent block additions. [c] Initiator solution of 100 mg VA-044 in 10 mL H<sub>2</sub>O (0.0309 M). [d] Represents the total amount of VA-044 at time t<sub>0</sub> considering the moles of VA-044 added (I<sub>added</sub>) + the moles of VA-044 remaining (I<sub>rem</sub>) from the previous block after 2h. I<sub>rem</sub> = I<sub>total</sub> - 2fc<sup>-kd</sup> (1-fc/2)<sup>[1]</sup>. [e] Conversion was calculated by <sup>1</sup>H NMR. [f]  $M_n^{(theory)} = ([Monomer]_0/[CTA]_0)^p \cdot M_{monomer} + M_{CTA}$ , where [Monomer]<sub>0</sub>/[CTA]<sub>0</sub> is the ratio of monomer to CTA at time zero, p is the conversion of polymerization and M<sub>monomer</sub> and M<sub>CTA</sub> are the molecular weights of the monomer and the CTA.

**Table S6.** Experimental conditions and characterization data for the synthesis of P(DMA-b-NAM-b-DMA-b- NAM-b -DMA) pentablock copolymer with DP=500.<sup>[a]</sup> Data corresponds to Figure 2c-2d.

| No. block | CTA 2 (mg) | CTA (10 <sup>-5</sup> mol) | DP  | M   | Monomer (10 <sup>-3</sup> mol) | Monomer (mL) | [VA-044]:[CTA] <sub>[b]</sub> | VA-044 (10 <sup>-7</sup> mol) | I <sub>added</sub> (uL) <sup>[c]</sup> | M%  | H <sub>2</sub> SO <sub>4</sub> (uL) | H <sub>2</sub> O (mL) | V <sub>tot</sub> (mL) | I <sub>rem</sub> (10 <sup>-8</sup> mol) | I <sub>tot</sub> (10 <sup>-7</sup> mol) <sup>[d]</sup> | % Conv. <sub>[e]</sub> | $\bar{D}$ | $M_n^{(Theo.)}$ (g mol <sup>-1</sup> ) <sub>[f]</sub> | $M_n^{(SEC)}$ | %L Block | %L Total |
|-----------|------------|----------------------------|-----|-----|--------------------------------|--------------|-------------------------------|-------------------------------|----------------------------------------|-----|-------------------------------------|-----------------------|-----------------------|-----------------------------------------|--------------------------------------------------------|------------------------|-----------|-------------------------------------------------------|---------------|----------|----------|
| 1         | 3.2        | 1.18                       | 500 | DMA | 5.9                            | 0.60981      | 0.0202                        | 2.4                           | 7.73                                   | 0.2 | 6.58                                | 2.431                 | 3.049                 |                                         | 2.40                                                   | 97                     | 1.16      | 48300                                                 | 54900         | 98.1     | 98.1     |
| 2         | -          | -                          | 500 | NAM | 5.9                            | 0.74458      | 0.0120                        | 1.4                           | 4.59                                   | 0.2 | 6.58                                | 2.974                 | 3.723                 | 1.10                                    | 1.53                                                   | 98                     | 1.19      | 117500                                                | 108100        | 98.8     | 96.9     |
| 3         | -          | -                          | 500 | DMA | 5.9                            | 0.60981      | 0.0180                        | 2.1                           | 6.89                                   | 0.2 | 6.58                                | 2.432                 | 3.049                 | 0.69                                    | 2.20                                                   | 96                     | 1.21      | 165100                                                | 155600        | 98.3     | 95.2     |
| 4         | -          | -                          | 500 | NAM | 5.9                            | 0.74458      | 0.0220                        | 2.6                           | 8.42                                   | 0.2 | 6.58                                | 2.970                 | 3.723                 | 1.00                                    | 2.70                                                   | 97                     | 1.32      | 233600                                                | 184600        | 97.9     | 93.2     |
| 5         | -          | -                          | 500 | DMA | 5.9                            | 0.60981      | 0.0285                        | 3.4                           | 10.90                                  | 0.2 | 6.58                                | 2.428                 | 3.049                 | 1.20                                    | 3.50                                                   | 96                     | 1.38      | 281200                                                | 227300        | 97.3     | 90.6     |

[a] All polymerizations were performed in Water at 70 °C with 120 reaction time per block. The volume ratio of solvent to monomer was maintained at 0.80:0.20. [b] [CTA] refers to the initial equivalents of methyl 2-[methyl(4-pyridinyl)carbamothioylthio]propionate and subsequently the equivalents of macroCTA derived from this CTA. No additional CTA was added during the subsequent block additions. [c] Initiator solution of 100 mg VA-044 in 10 mL H<sub>2</sub>O (0.0309 M). [d] Represents the total amount of VA-044 at time t<sub>0</sub> considering the moles of VA-044 added (I<sub>added</sub>) + the moles of VA-044 remaining (I<sub>rem</sub>) from the previous block after 2h. I<sub>rem</sub> = I<sub>total</sub> - 2fc<sup>-kd</sup> (1-fc/2)<sup>[1]</sup>. [e] Conversion was calculated by <sup>1</sup>H NMR. [f]  $M_n^{(theory)} = ([Monomer]_0/[CTA]_0)^p \cdot M_{monomer} + M_{CTA}$ , where [Monomer]<sub>0</sub>/[CTA]<sub>0</sub> is the ratio of monomer to CTA at time zero, p is the conversion of polymerization and M<sub>monomer</sub> and M<sub>CTA</sub> are the molecular weights of the monomer and the CTA.

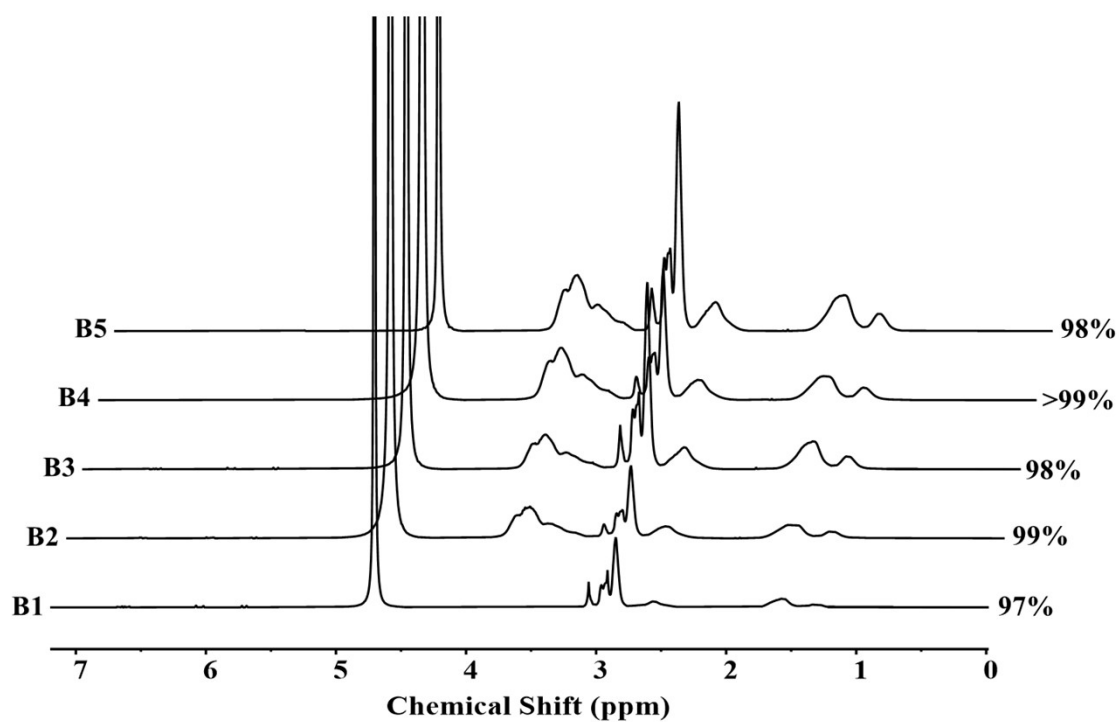

**Figure S6.**  $^1\text{H}$  NMR spectra of P(DMA-*b*-NAM-*b*-DMA-*b*-NAM-*b*-DMA) pentablock copolymer with DP=200.

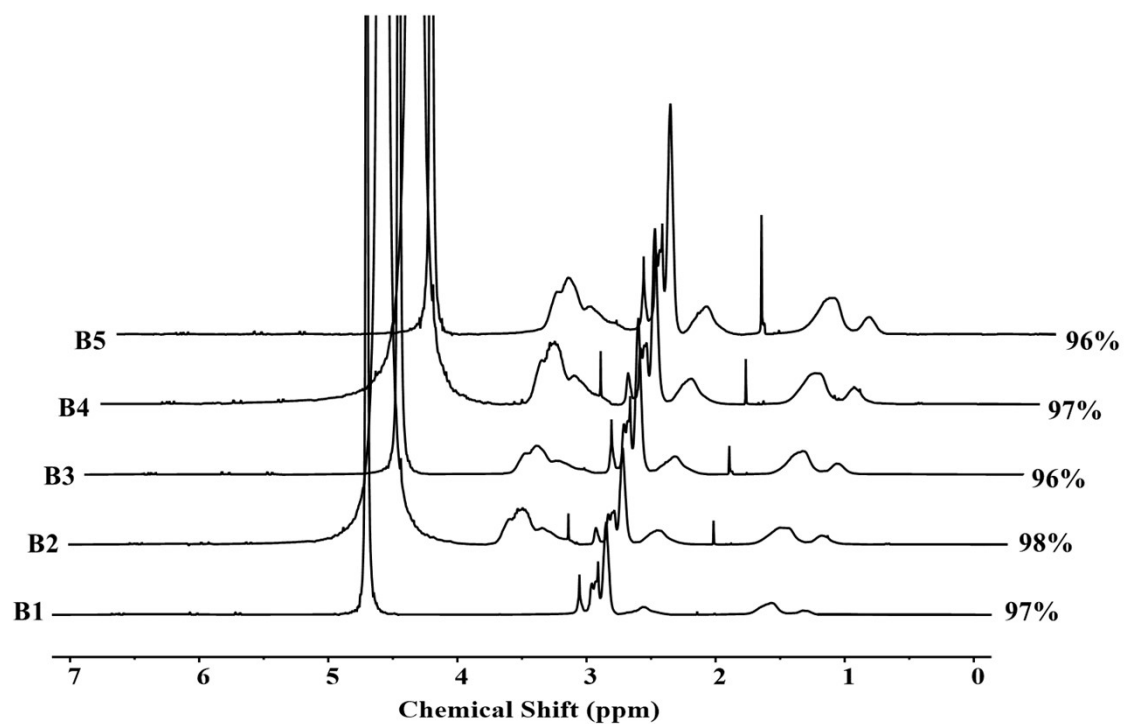

**Figure S7.**  $^1\text{H}$  NMR spectra of P(DMA-*b*-NAM-*b*-DMA-*b*-NAM-*b*-DMA) pentablock copolymer with DP=500.

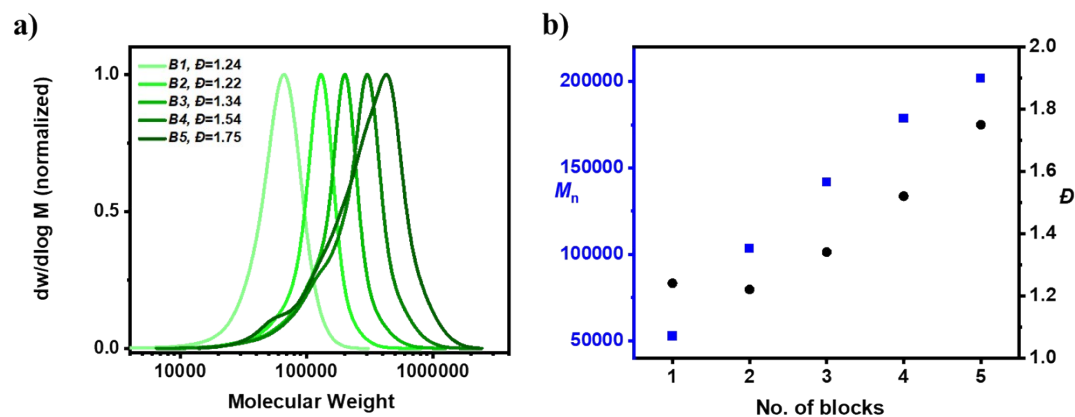

**Figure S8.** a) SEC traces illustrating the molecular weight distributions for consecutive cycles during the synthesis of a pentablock with DP=500 and CTA 1. b) Evolution of dispersity (black) and the measured molecular weight (blue) during this multiblock synthesis.

**Table S7.** Experimental conditions and characterization data for the synthesis of P(DMA-b-NAM-b-DMA-b-NAM-b-DMA) pentablock copolymer with DP=500.<sup>[a]</sup> Data corresponds to figures X.

| No. block | CTA 1 (mg) | CTA (10 <sup>-5</sup> mol) | DP  | M   | Monomer (10 <sup>-3</sup> mol) | Monomer (mL) | [VA-044]:[CTA] <sub>0</sub> <sup>[b]</sup> | VA-044 (10 <sup>-7</sup> mol) | I <sub>added</sub> (μL) <sup>[c]</sup> | M % | H <sub>2</sub> SO <sub>4</sub> (μL) | H <sub>2</sub> O (mL) | V <sub>tot</sub> (mL) | I <sub>rem</sub> (10 <sup>-8</sup> mol) | I <sub>tot</sub> (10 <sup>-7</sup> mol) <sup>[d]</sup> | % Conv. <sup>[e]</sup> | $\bar{D}$ | $M_n^{(Theo.)}$ (g mol <sup>-1</sup> ) <sup>[f]</sup> | $M_n^{(SEC)}$ | %L Block | %L Total |
|-----------|------------|----------------------------|-----|-----|--------------------------------|--------------|--------------------------------------------|-------------------------------|----------------------------------------|-----|-------------------------------------|-----------------------|-----------------------|-----------------------------------------|--------------------------------------------------------|------------------------|-----------|-------------------------------------------------------|---------------|----------|----------|
| 1         | 2.8        | 1.18                       | 500 | DMA | 5.9                            | 0.60981      | 0.0808                                     | 9.6                           | 30.9                                   | 0.2 | -                                   | 2.408                 | 3.049                 |                                         | 9.60                                                   | 94                     | 1.24      | 46900                                                 | 52700         | 92.8     | 92.8     |
| 2         | -          | -                          | 500 | NAM | 5.9                            | 0.74458      | 0.0404                                     | 4.8                           | 15.5                                   | 0.2 | -                                   | 2.963                 | 3.723                 | 4.33                                    | 5.21                                                   | 96                     | 1.22      | 114600                                                | 103400        | 96.0     | 89.1     |
| 3         | -          | -                          | 500 | DMA | 5.9                            | 0.60981      | 0.0672                                     | 8.0                           | 25.7                                   | 0.2 | -                                   | 2.414                 | 3.049                 | 2.35                                    | 8.19                                                   | 84                     | 1.34      | 156300                                                | 141800        | 93.8     | 83.6     |
| 4         | -          | -                          | 500 | NAM | 5.9                            | 0.74458      | 0.1212                                     | 14.3                          | 46.4                                   | 0.2 | -                                   | 2.932                 | 3.723                 | 3.71                                    | 14.71                                                  | 95                     | 1.54      | 223300                                                | 178600        | 89.4     | 74.7     |
| 5         | -          | -                          | 500 | DMA | 5.9                            | 0.60981      | 0.1602                                     | 19.0                          | 61.3                                   | 0.2 | -                                   | 2.378                 | 3.049                 | 6.66                                    | 19.63                                                  | 93                     | 1.75      | 269400                                                | 202000        | 86.3     | 64.5     |

[a] All polymerizations were performed in Water at 70 °C with 120' reaction time per block. The volume ratio of solvent to monomer was maintained at 0.80:0.20. [b] [CTA] refers to the initial equivalents of 2-(((Butylsulfanyl)carbothioyl)sulfanyl)propanoic acid and subsequently the equivalents of macroCTA derived from this CTA. No additional CTA was added during the subsequent block additions. [c] Initiator solution of 100 mg VA-044 in 10 mL H<sub>2</sub>O (0.0309 M). [d] Represents the total amount of VA-044 at time t<sub>0</sub> considering the moles of VA-044 added (I<sub>added</sub>) + the moles of VA-044 remaining (I<sub>rem</sub>) from the previous block after 2h. I<sub>rem</sub> = I<sub>total</sub> - 2fe<sup>-kd<sub>th</sub>t</sup> (1-fc/2)<sup>[1]</sup>. [e] Conversion was calculated by <sup>1</sup>H NMR. [f]  $M_n^{(theory)} = ([Monomer]_0/[CTA]_0)^p \cdot M_{monomer} + M_{CTA}$ , where [Monomer]<sub>0</sub>/[CTA]<sub>0</sub> is the ratio of monomer to CTA at time zero, p is the conversion of polymerization and M<sub>monomer</sub> and M<sub>CTA</sub> are the molecular weights of the monomer and the CTA.

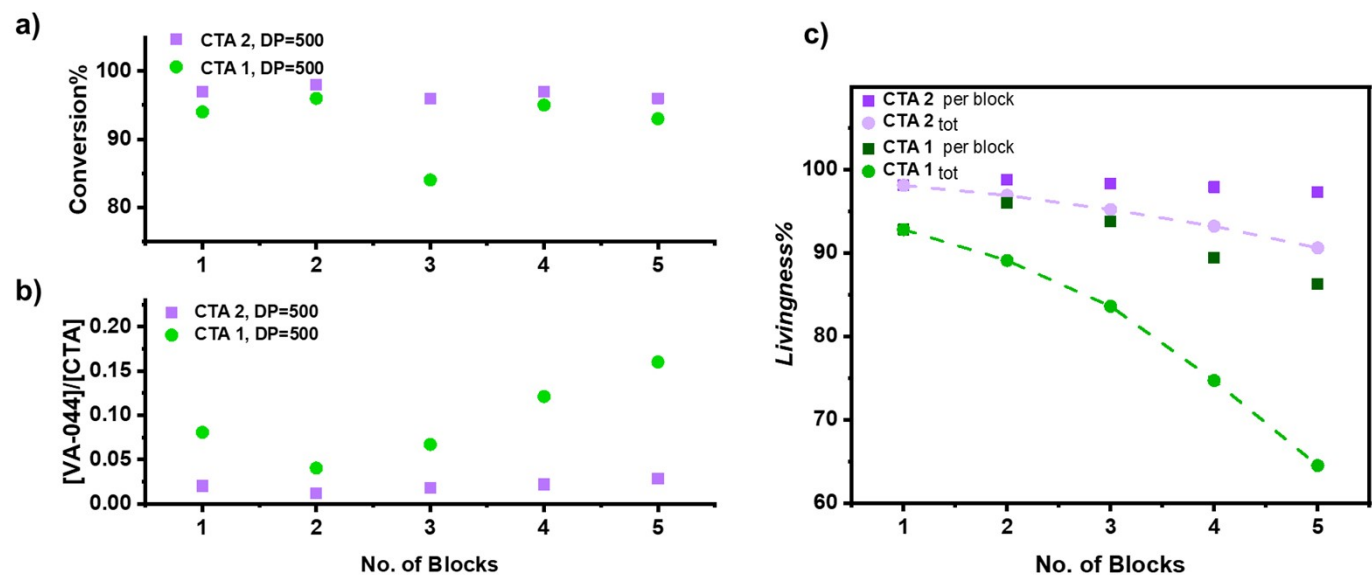

**Figure S9.** **a)** Conversion per block of pentablock copolymer with DP=500, with switchable CTA 2 (purple) in presence of acid (corresponds to fig.3) and of pentablock copolymer with CTA 1 in absence of acid (green). **b)** Initiator concentration (with respect to the CTA) for each block, that corresponds to the conversion in figure 9a, where purple data points correspond to CTA 2 pentablock copolymer, and green data points correspond to CTA 1 pentablock copolymer. **c)** Livingness per block for CTA 2 pentablock copolymer (dark purple), evolution of total livingness of CTA 2 pentablock copolymer (light purple), livingness per block for CTA 1 pentablock copolymer (dark green) and evolution of total livingness of CTA 1 pentablock copolymer (light green).

## Data corresponding to Figure 5

**Table S8.** Experimental conditions and characterization data for the synthesis of P(NAM-b-DMA-b-NAM-b-DMA-b- NAM-b -DMA-b-NAM-b-DMA-b- NAM-b-DMA-b-NAM-b-DMA-b-NAM-b-DMA-b- NAM-b -DMA-b-NAM-b-DMA-b-NAM-b-DMA) icosablock copolymer with low DP.<sup>[a]</sup> Data corresponds to figures X.

| No. block        | CTA 1 (mg) | CTA (10 <sup>-5</sup> mol) | DP | M   | Monomer (10 <sup>-4</sup> mol) | Monomer (mL) | [VA-044]:[CTA] <sup>[b]</sup> | VA-044 (10 <sup>-7</sup> mol) | I <sub>added</sub> (uL) <sup>[c]</sup> | M%   | H <sub>2</sub> SO <sub>4</sub> (uL) | H <sub>2</sub> O (mL) | V <sub>tot</sub> (mL) | I <sub>rem</sub> (10 <sup>-8</sup> mol) | I <sub>tot</sub> (10 <sup>-7</sup> mol) <sup>[d]</sup> | % Conv. <sup>[e]</sup> | $M_n^{(Theor.)}$ (g mol <sup>-1</sup> ) <sup>[f]</sup> | $M_n^{(SEC)}$ | $\bar{D}$ | %L Block | %L Total |
|------------------|------------|----------------------------|----|-----|--------------------------------|--------------|-------------------------------|-------------------------------|----------------------------------------|------|-------------------------------------|-----------------------|-----------------------|-----------------------------------------|--------------------------------------------------------|------------------------|--------------------------------------------------------|---------------|-----------|----------|----------|
| 1                | 31.2       | 11.54                      | 30 | NAM | 34.62                          | 0.436        | 0.0030                        | 3.5                           | 11.19                                  | 0.15 | 6.4                                 | 2.457                 | 2.90                  |                                         | 3.46                                                   | >99.9                  | 4500                                                   | 3600          | 1.25      | 99.8     | 99.8     |
| 2                | -          | -                          | 6  | DMA | 6.92                           | 0.0714       | 0.0017                        | 2.0                           | 6.34                                   | 0.2  | 0.250                               | 0.279                 | 0.36                  | 9.5                                     | 2.91                                                   | 99                     | 5100                                                   | 4100          | 1.22      | 99.9     | 99.7     |
| 3                | -          | -                          | 6  | NAM | 6.92                           | 0.0871       | 0.0011                        | 1.3                           | 4.10                                   | 0.2  | 0.250                               | 0.344                 | 0.44                  | 8.0                                     | 2.08                                                   | >99.9                  | 5900                                                   | 4700          | 1.19      | 99.9     | 99.5     |
| 4                | -          | -                          | 6  | DMA | 6.92                           | 0.0714       | 0.0021                        | 2.4                           | 7.83                                   | 0.2  | 0.250                               | 0.278                 | 0.36                  | 5.7                                     | 2.99                                                   | 97                     | 6500                                                   | 5200          | 1.18      | 99.8     | 99.3     |
| 5                | -          | -                          | 6  | NAM | 6.92                           | 0.0871       | 0.0012                        | 1.4                           | 4.48                                   | 0.2  | 0.250                               | 0.344                 | 0.44                  | 8.2                                     | 2.21                                                   | 98                     | 7300                                                   | 5700          | 1.17      | 99.9     | 99.2     |
| 6                | -          | -                          | 6  | DMA | 6.92                           | 0.0714       | 0.0021                        | 2.4                           | 7.83                                   | 0.2  | 0.250                               | 0.278                 | 0.36                  | 6.1                                     | 3.01                                                   | 98                     | 7900                                                   | 6100          | 1.16      | 99.9     | 99.1     |
| 7                | -          | -                          | 6  | NAM | 6.92                           | 0.0871       | 0.0015                        | 1.7                           | 5.60                                   | 0.2  | 0.250                               | 0.343                 | 0.44                  | 8.3                                     | 2.57                                                   | 99                     | 8800                                                   | 6600          | 1.16      | 99.8     | 98.9     |
| 8 <sup>[g]</sup> | -          | -                          | 6  | DMA | 3.46                           | 0.0357       | 0.0024                        | 1.7                           | 4.48                                   | 0.2  | 0.125                               | 0.138                 | 0.18                  | 3.6                                     | 1.74                                                   | 97                     | 9300                                                   | 7200          | 1.14      | 99.8     | 98.7     |
| 9                | -          | -                          | 6  | NAM | 3.46                           | 0.0436       | 0.0015                        | 1.7                           | 2.80                                   | 0.2  | 0.125                               | 0.171                 | 0.22                  | 4.8                                     | 1.35                                                   | 99                     | 10200                                                  | 7800          | 1.13      | 99.8     | 98.4     |
| 10               | -          | -                          | 6  | DMA | 3.46                           | 0.0357       | 0.0023                        | 2.7                           | 4.29                                   | 0.2  | 0.125                               | 0.139                 | 0.18                  | 3.7                                     | 1.70                                                   | 98                     | 10800                                                  | 8800          | 1.13      | 99.8     | 98.3     |
| 11               | -          | -                          | 6  | NAM | 3.46                           | 0.0436       | 0.0016                        | 1.8                           | 2.99                                   | 0.2  | 0.125                               | 0.171                 | 0.22                  | 4.7                                     | 1.39                                                   | 99                     | 11600                                                  | 9500          | 1.13      | 99.9     | 98.1     |
| 12               | -          | -                          | 6  | DMA | 3.46                           | 0.0357       | 0.0022                        | 2.8                           | 4.11                                   | 0.2  | 0.125                               | 0.139                 | 0.18                  | 3.9                                     | 1.65                                                   | 99                     | 12200                                                  | 10400         | 1.13      | 99.8     | 97.9     |
| 13               | -          | -                          | 6  | NAM | 3.46                           | 0.0436       | 0.0033                        | 3.8                           | 6.16                                   | 0.2  | 0.125                               | 0.168                 | 0.22                  | 4.6                                     | 2.36                                                   | 98                     | 13000                                                  | 11400         | 1.13      | 99.7     | 97.6     |
| 14               | -          | -                          | 6  | DMA | 3.46                           | 0.0357       | 0.0042                        | 4.8                           | 7.84                                   | 0.2  | 0.125                               | 0.135                 | 0.18                  | 6.5                                     | 3.08                                                   | >99.9                  | 13600                                                  | 12300         | 1.14      | 99.7     | 97.2     |
| 15               | -          | -                          | 6  | NAM | 3.46                           | 0.0436       | 0.0031                        | 3.6                           | 5.78                                   | 0.2  | 0.125                               | 0.169                 | 0.22                  | 8.5                                     | 2.64                                                   | 99                     | 14500                                                  | 13500         | 1.13      | 99.7     | 96.9     |
| 16               | -          | -                          | 6  | DMA | 3.46                           | 0.0357       | 0.0043                        | 5.0                           | 8.02                                   | 0.2  | 0.125                               | 0.135                 | 0.18                  | 7.5                                     | 3.21                                                   | 98                     | 15000                                                  | 14300         | 1.15      | 99.6     | 96.6     |
| 17               | -          | -                          | 6  | NAM | 3.46                           | 0.0436       | 0.003                         | 3.5                           | 5.60                                   | 0.2  | 0.125                               | 0.169                 | 0.22                  | 9.0                                     | 2.62                                                   | 99                     | 15900                                                  | 15500         | 1.14      | 99.7     | 96.2     |
| 18               | -          | -                          | 6  | DMA | 3.46                           | 0.0357       | 0.0043                        | 5.0                           | 8.02                                   | 0.2  | 0.125                               | 0.135                 | 0.18                  | 7.1                                     | 3.20                                                   | >99.9                  | 16500                                                  | 16700         | 1.15      | 99.6     | 95.8     |
| 19               | -          | -                          | 6  | NAM | 3.46                           | 0.0436       | 0.0033                        | 3.8                           | 6.16                                   | 0.2  | 0.125                               | 0.168                 | 0.22                  | 9.1                                     | 2.79                                                   | 99                     | 17300                                                  | 17000         | 1.15      | 99.7     | 95.5     |
| 20               | -          | -                          | 6  | DMA | 3.46                           | 0.0357       | 0.003                         | 3.5                           | 5.60                                   | 0.2  | 0.125                               | 0.137                 | 0.18                  | 7.4                                     | 2.50                                                   | 99                     | 17900                                                  | 17600         | 1.17      | 99.7     | 95.2     |

[a] All polymerizations were performed in Water at 70 °C with 120' reaction time per block. The volume ratio of solvent to monomer was maintained at 0.80:0.20. [b] [CTA] refers to the initial equivalents of methyl 2-[methyl(4-pyridinyl)carbamothioylthio]propionate and subsequently the equivalents of macroCTA derived from this CTA. No additional CTA was added during the subsequent block additions. [c] Initiator solution of 100 mg VA-044 in 10 mL H<sub>2</sub>O (0.0309 M). [d] Represents the total amount of VA-044 at time t<sub>0</sub> considering the moles of VA-044 added (I<sub>added</sub>) + the moles of VA-044 remaining (I<sub>rem</sub>) from the previous block after 2h. I<sub>rem</sub>=

$I_{\text{total}} \propto 2fe^{-kd_{\text{eff}}} \propto (1-fc/2)^{[1]}$ . [e] Conversion was calculated by  $^1\text{H}$  NMR. [f]  $M_{n(\text{theory})} = ([\text{Monomer}]_0/[\text{CTA}]_0) \cdot p \cdot M_{\text{monomer}} + M_{\text{CTA}}$ , where  $[\text{Monomer}]_0/[\text{CTA}]_0$  is the ratio of monomer to CTA at time zero,  $p$  is the conversion of polymerization and  $M_{\text{monomer}}$  and  $M_{\text{CTA}}$  are the molecular weights of the monomer and the CTA. [g] Half of the quantity was removed from the vial.

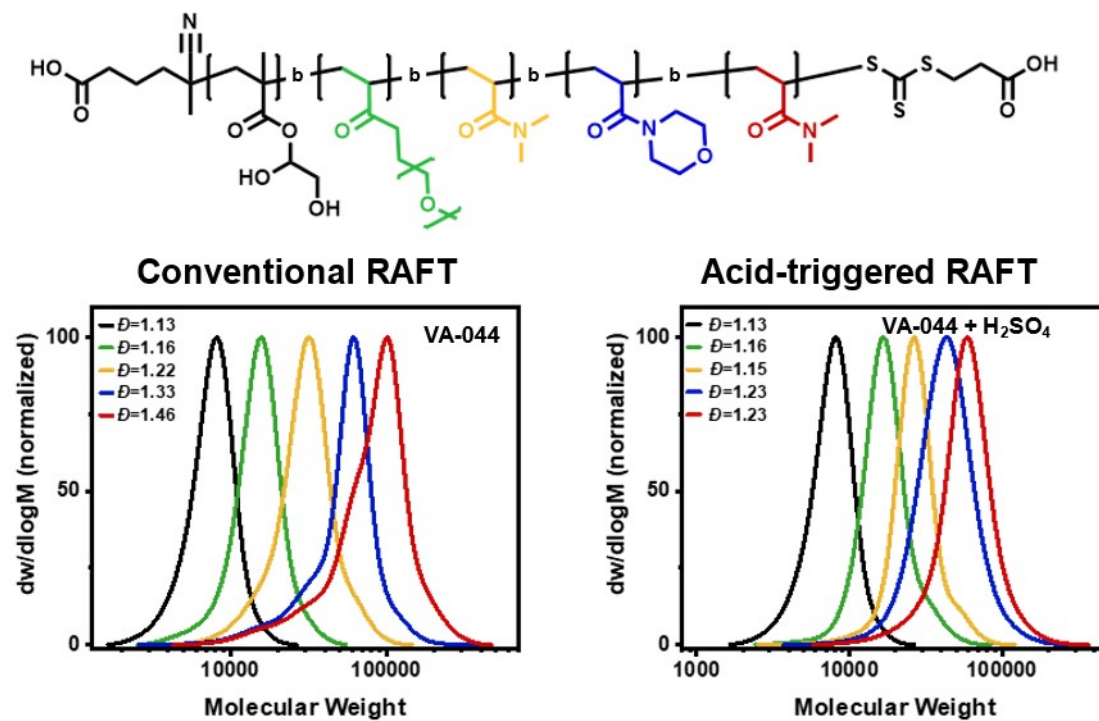

**Figure S10.** Pentablock copolymers synthesized with conventional RAFT versus acid-triggered RAFT.

**Table S9.** Experimental conditions and characterization data for the synthesis of P(GDMA-b-PPEGA<sub>480</sub>-b-DMA-b- NAM-b -DMA) pentablock copolymer .<sup>[a]</sup> Data corresponds to Figure S10.

| No. block | CTA 3 <sup>[b]</sup><br>(mg) | CTA (10 <sup>-5</sup> mol) | DP | M                   | Mono mer (10 <sup>-3</sup> mol) | Monomer (mL) | [VA-044]:[C TA] <sup>[c]</sup> | VA-044 (10 <sup>-7</sup> mol) | I <sub>added</sub> (ul) <sup>[d]</sup> | M% | H <sub>2</sub> SO <sub>4</sub> (uL) | H <sub>2</sub> O (mL) | % Conv. <sup>[f]</sup> | $\bar{D}$ | $M_n^{(Theo.)}$ (g mol <sup>-1</sup> ) <sup>[g]</sup> | $M_n^{(SEC)}$ |
|-----------|------------------------------|----------------------------|----|---------------------|---------------------------------|--------------|--------------------------------|-------------------------------|----------------------------------------|----|-------------------------------------|-----------------------|------------------------|-----------|-------------------------------------------------------|---------------|
| 1         | 7.5                          | 2.44                       | 15 | GMA                 | 0.37                            | 0.52         | 0.015                          | 3.7                           | 11.8                                   | 20 | 0.7                                 | -                     | >99                    | 1.13      | 2700                                                  | 8100          |
| 2         | -                            | -                          | 15 | PGEA <sub>480</sub> | 0.37                            | 0.16         | 0.018                          | 4.4                           | 14.2                                   | 20 | 1.5                                 | 0.62                  | 97                     | 1.16      | 9700                                                  | 15700         |
| 3         | -                            | -                          | 75 | DMA                 | 1.83                            | 0.19         | 0.011                          | 2.7                           | 8.7                                    | 20 | 1.0                                 | 0.73                  | 95                     | 1.15      | 16700                                                 | 24700         |
| 4         | -                            | -                          | 75 | NAM                 | 1.83                            | 0.23         | 0.01                           | 2.4                           | 7.9                                    | 20 | 1.5                                 | 0.91                  | >99                    | 1.23      | 27300                                                 | 37800         |
| 5         | -                            | -                          | 75 | DMA                 | 1.83                            | 0.19         | 0.013                          | 3.2                           | 10.3                                   | 20 | 1.0                                 | 0.73                  | 98                     | 1.23      | 34600                                                 | 51300         |

[a] All polymerizations were performed in Water at 70 °C with 120 reaction time per block. The volume ratio of solvent to monomer was maintained at 0.80:0.20.[b] CTA 3 refers to 4-(((2-Carboxyethyl)thio)carbonothioyl)thio)-4-cyanopentanoic acid [c] [CTA] refers to the initial equivalents of of methyl 2-[methyl(4-pyridinyl)carbamothioylthio]propionate and subsequently the equivalents of macroCTA derived from this CTA. No additional CTA was added during the subsequent block additions. [d] Initiator solution of 100 mg VA-044 in 10 mL H<sub>2</sub>O (0.0309 M). [e] Represents the total amount of VA-044 at time t0 considering the moles of VA-044 added (I<sub>added</sub>) + the moles of VA-044 remaining (I<sub>rem</sub>) from the previous block after 2h. I<sub>rem</sub> = I<sub>total</sub> - 2fe<sup>-k<sub>dt</sub>t</sup> (1-fc/2)<sup>[1]</sup>. [f] Conversion was calculated by <sup>1</sup>H NMR. [g]  $M_n^{(theory)} = ([Monomer]_0/[CTA]_0) \cdot p \cdot M_{monomer} + M_{CTA}$ , where [Monomer]<sub>0</sub>/[CTA]<sub>0</sub> is the ratio of monomer to CTA at time zero, p is the conversion of polymerization and M<sub>monomer</sub> and M<sub>CTA</sub> are the molecular weights of the monomer and the CTA.

**Table S10.** Experimental conditions and characterization data for the synthesis of P(GDMA-b-PPEGA<sub>480</sub>-b-DMA-b- NAM-b -DMA) pentablock copolymer .<sup>[a]</sup> Data corresponds to Figure S10.

| No. block | CTA 3 <sup>[b]</sup><br>(mg) | CTA (10 <sup>-5</sup> mol) | DP | M                   | Mono mer (10 <sup>-3</sup> mol) | Monomer (mL) | [VA-044]:[C TA] <sup>[c]</sup> | VA-044 (10 <sup>-7</sup> mol) | I <sub>added</sub> (ul) <sup>[d]</sup> | M% | H <sub>2</sub> SO <sub>4</sub> (uL) | H <sub>2</sub> O (mL) | % Conv. <sup>[f]</sup> | $\bar{D}$ | $M_n^{(Theo.)}$ (g mol <sup>-1</sup> ) <sup>[g]</sup> | $M_n^{(SEC)}$ |
|-----------|------------------------------|----------------------------|----|---------------------|---------------------------------|--------------|--------------------------------|-------------------------------|----------------------------------------|----|-------------------------------------|-----------------------|------------------------|-----------|-------------------------------------------------------|---------------|
| 1         | 7.5                          | 2.44                       | 15 | GMA                 | 0.37                            | 0.52         | 0.022                          | 5.37                          | 17.4                                   | 20 | -                                   | -                     | 98                     | 1.13      | 2700                                                  | 7000          |
| 2         | -                            | -                          | 15 | PGEA <sub>480</sub> | 0.37                            | 0.16         | 0.030                          | 7.32                          | 23.7                                   | 20 | -                                   | 0.62                  | 98                     | 1.16      | 9700                                                  | 13600         |
| 3         | -                            | -                          | 75 | DMA                 | 1.83                            | 0.19         | 0.022                          | 5.37                          | 17.4                                   | 20 | -                                   | 0.73                  | 99                     | 1.22      | 17100                                                 | 26500         |
| 4         | -                            | -                          | 75 | NAM                 | 1.83                            | 0.23         | 0.018                          | 4.39                          | 14.2                                   | 20 | -                                   | 0.91                  | 99                     | 1.33      | 27600                                                 | 43800         |
| 5         | -                            | -                          | 75 | DMA                 | 1.83                            | 0.19         | 0.029                          | 7.08                          | 22.9                                   | 20 | -                                   | 0.73                  | 97                     | 1.46      | 34700                                                 | 62100         |

[a] All polymerizations were performed in Water at 70 °C with 120 reaction time per block. The volume ratio of solvent to monomer was maintained at 0.80:0.20.[b] CTA 3 refers to 4-(((2-Carboxyethyl)thio)carbonothioyl)thio)-4-cyanopentanoic acid [c] [CTA] refers to the initial equivalents of of methyl 2-[methyl(4-pyridinyl)carbamothioylthio]propionate and subsequently the equivalents of macroCTA derived from this CTA. No additional CTA was added during the subsequent block additions. [d] Initiator solution of 100 mg VA-044 in 10 mL H<sub>2</sub>O (0.0309 M). [e] Represents the total amount of VA-044 at time t0 considering the moles of VA-044 added (I<sub>added</sub>) + the moles of VA-044 remaining (I<sub>rem</sub>) from the previous block after 2h. I<sub>rem</sub> = I<sub>total</sub> - 2fe<sup>-k<sub>dt</sub>t</sup> (1-fc/2)<sup>[1]</sup>. [f] Conversion was calculated by <sup>1</sup>H NMR. [g]  $M_n^{(theory)} = ([Monomer]_0/[CTA]_0) \cdot p \cdot M_{monomer} + M_{CTA}$ , where [Monomer]<sub>0</sub>/[CTA]<sub>0</sub> is the ratio of monomer to CTA at time zero, p is the conversion of polymerization and M<sub>monomer</sub> and M<sub>CTA</sub> are the molecular weights of the monomer and the CTA.



### References

- [1] Gody, G., Maschmeyer, T., Zetterlund, P. B. & Perrier, S. Rapid and quantitative one-pot synthesis of sequence-controlled polymers by radical polymerization. *Nature communications* **4**, 2505 (2013).
